# Supplementary material
Source: HighWire-hosted journal article supplement (https://bmjopen.bmj.com/content/8/11/e022334)
Supplement: inline-supplementary-material-1 [file inline-supplementary-material-1.pdf]

Table S1 The linkage disequilibrium coefficient between SNPs of IL-10

|           | rs1800896 | rs1800871 | rs3021094 | rs3790622 |
|-----------|-----------|-----------|-----------|-----------|
| rs1800896 | —         | 0.9848    | 0.9982    | 0.9937    |
| rs1800871 | 0.1884    | —         | 0.9996    | 0.9981    |
| rs3021094 | 0.0740    | 0.3824    | —         | 0.9988    |
| rs3790622 | 0.0095    | 0.0496    | 0.1298    | —         |

Values on the left of “—” are  $r^2$  and on the right are Lewontin’s  $D'$  coefficients.

Table S2 The linkage disequilibrium coefficient between SNPs of IL-10RA

|           | rs2282494 | rs2508450 | rs4252249 |
|-----------|-----------|-----------|-----------|
| rs2282494 | —         | 0.9976    | 0.9931    |
| rs2508450 | 0.0305    | —         | 0.9979    |
| rs4252249 | 0.0130    | 0.4276    | —         |

Values on the left of “—” are  $r^2$  and on the right are Lewontin’s  $D'$  coefficients.
